# Supplementary material for: Cell-type–specific eQTL of primary melanocytes facilitates identification of melanoma susceptibility genes
Source: HighWire-hosted journal article supplement (doi:10.1101/gr.233304.117), 2018-10-17
Supplement: Supplemental_Tables.xlsx [file Supplemental_Tables.xlsx]

## Sheet: T-S1
Supplemental Table S1. Ancestry estimation of 106 individuals
Sample Name	Submitted Name	CEU	CHB	YRI	Imputed ancestry
KB24	C179	0.9684	0.0153	0.0163	CEU
KB23	C282	0.9682	0.0188	0.0129	CEU
KB38	C53	0.966	0.0225	0.0115	CEU
KB91	C165	0.9649	0.0176	0.0175	CEU
KB104	C178	0.9647	0.0197	0.0156	CEU
KB45	C15	0.9624	0.0259	0.0118	CEU
KB73	C174	0.9618	0.0213	0.0169	CEU
KB44	C355	0.9615	0.0202	0.0182	CEU
KB75	C245	0.9615	0.0227	0.0158	CEU
KB83	C192	0.9611	0.02	0.019	CEU
KB87	C200	0.9605	0.0201	0.0195	CEU
KB30	C166	0.9603	0.0266	0.0131	CEU
KB69	CSD2	0.9601	0.0248	0.0151	CEU
KB89	C252	0.9595	0.0221	0.0184	CEU
KB12	C55	0.9593	0.0207	0.02	CEU
KB99	C336	0.9593	0.0171	0.0236	CEU
KB7	C202	0.9589	0.0186	0.0225	CEU
KB67	C168	0.9573	0.0296	0.0131	CEU
KB22	C197	0.9572	0.0241	0.0187	CEU
KB8	C236	0.9571	0.0245	0.0184	CEU
KB10	C205	0.9571	0.0278	0.0151	CEU
KB15	C29	0.9567	0.0281	0.0152	CEU
KB108	C304	0.9563	0.0274	0.0163	CEU
KB101	C83	0.9556	0.0272	0.0172	CEU
KB71	C80	0.9546	0.0273	0.0182	CEU
KB33	C43	0.9534	0.0212	0.0254	CEU
KB106	C140	0.9531	0.025	0.0219	CEU
KB56	C234	0.9529	0.0296	0.0175	CEU
KB79	C87	0.9524	0.0202	0.0274	CEU
KB85	C31	0.951	0.0263	0.0226	CEU
KB19	C6	0.9494	0.0299	0.0207	CEU
KB41	C54	0.9491	0.0328	0.0181	CEU
KB68	C318	0.9489	0.0272	0.0239	CEU
KB70	C167	0.9482	0.0252	0.0266	CEU
KB55	C28	0.9476	0.0204	0.032	CEU
KB86	C360	0.9471	0.0313	0.0216	CEU
KB77	C22	0.9465	0.0263	0.0272	CEU
KB2	C136	0.9461	0.0306	0.0233	CEU
KB63	C14	0.9453	0.0288	0.0259	CEU
KB53	C344	0.9452	0.0364	0.0183	CEU
KB84	C78	0.9451	0.0295	0.0254	CEU
KB6	C72	0.9428	0.0295	0.0277	CEU
KB16	C365	0.9427	0.0281	0.0292	CEU
KB29	C71	0.9411	0.0319	0.0269	CEU
KB42	C262	0.9407	0.0386	0.0207	CEU
KB98	C251	0.9399	0.0318	0.0282	CEU
KB27	C134	0.9392	0.0312	0.0297	CEU
KB26	C68	0.9389	0.0397	0.0215	CEU
KB1	C56	0.9386	0.0348	0.0265	CEU
KB21	C363	0.9381	0.0273	0.0346	CEU
KB49	C21	0.938	0.0309	0.031	CEU
KB5	C104	0.9376	0.0307	0.0316	CEU
KB80	C64	0.9362	0.0332	0.0306	CEU
KB9	C194	0.936	0.031	0.0329	CEU
KB82	C204	0.9343	0.03	0.0357	CEU
KB78	C76	0.9337	0.0372	0.0292	CEU
KB34	C225	0.9326	0.0329	0.0345	CEU
KB50	C303	0.9315	0.0271	0.0415	CEU
KB58	CSD1	0.9278	0.0484	0.0238	CEU
KB64	C73	0.9278	0.038	0.0342	CEU
KB31	C238	0.9269	0.0374	0.0357	CEU
KB59	C223	0.9263	0.0337	0.04	CEU
KB25	C283	0.9261	0.0296	0.0443	CEU
KB76	C34	0.9148	0.0428	0.0424	CEU
KB14	C219	0.9145	0.0357	0.0498	CEU
KB95	C77	0.9136	0.0318	0.0547	CEU
KB52	C74	0.9069	0.0404	0.0526	CEU
KB36	C220	0.906	0.0351	0.0589	CEU
KB93	C290	0.9053	0.0476	0.0472	CEU
KB37	C88	0.9032	0.0429	0.0539	CEU
KB3	C10	0.9	0.0703	0.0298	CEU
KB103	C25	0.9	0.0379	0.062	CEU
KB11	C244	0.8922	0.0529	0.0549	CEU
KB88	C173	0.861	0.0351	0.1039	CEU
KB90	C7	0.8295	0.039	0.1315	CEU
KB97	C185	0.8248	0.0698	0.1054	CEU
KB32	C17	0.8204	0.0758	0.1037	CEU
KB43	C250	0.7901	0.168	0.0419	ADMIXED CEU
KB17	C160	0.789	0.1979	0.0131	ADMIXED CEU
KB40	C38	0.7887	0.0608	0.1506	ADMIXED CEU
KB105	C91	0.7858	0.1668	0.0475	ADMIXED CEU
KB20	C62	0.7729	0.1833	0.0438	ADMIXED CEU
KB54	C198	0.7583	0.0429	0.1988	ADMIXED CEU
KB35	C8	0.7038	0.1009	0.1954	ADMIXED CEU
KB66	C191	0.7398	0.0581	0.2021	CEU,YRI
KB96	C12	0.6794	0.0409	0.2797	CEU,YRI
KB102	C230	0.6678	0.0173	0.3148	CEU,YRI
KB47	C240	0.6048	0.0261	0.369	CEU,YRI
KB51	C130	0.567	0.0301	0.4029	CEU,YRI
KB28	C65	0.5611	0.0201	0.4188	CEU,YRI
KB62	C206	0.5081	0.0228	0.4691	CEU,YRI
KB100	C146	0.3975	0.0363	0.5662	CEU,YRI
KB60	C241	0.3042	0.0267	0.669	CEU,YRI
KB46	C218	0.2651	0.0107	0.7242	CEU,YRI
KB81	C239	0.2221	0.0331	0.7447	CEU,YRI
KB18	C195	0.2135	0.0221	0.7644	CEU,YRI
KB4	C171	0.6494	0.2554	0.0952	CEU,CHB
KB92	C254	0.588	0.318	0.094	CEU,CHB
KB61	C326	0.5102	0.408	0.0818	CEU,CHB
KB65	C193	0.4989	0.4772	0.0239	CEU,CHB
KB109	C24	0.1709	0.0212	0.808	YRI
KB107	C291	0.1007	0.0201	0.8792	YRI
KB13	C27	0.0292	0.0092	0.9617	YRI
KB57	C20	0.0252	0.9629	0.0119	CHB
KB39	C16	0.0217	0.969	0.0093	CHB
KB74	C26	0.0119	0.9796	0.0085	CHB
Imputed ancestry:	YRI: YRI score > 0.8
	CEU: CEU score > 0.8
	CHB: CHB score > 0.8
	CEU,YRI: both CEU and YRI scores > 0.2 but < 0.8
	CEU,CHB: both CEU and CHB scores > 0.2 but < 0.8
	ADMIXED CEU: CEU score > 0.7 with secondary ancestry scores < 0.2
Submitted Name: sample name used in GEO submission

## Sheet: T-S2
Supplemental Table S2. Summary of melanocyte eGenes and significant eQTLs
Melanocytes	# of eGenes (FDR <0.05)	# of significant SNP-gene pairs	# of expressed genes	# of tested SNPs	# of pigmentation genes
with PEER normalization	4997	597335	19608	10718646	75
without PEER normalization	1624	203967	19608	10718646	13
Comparison datasets	# of eGenes (FDR <0.05)	# of significant SNP-gene pairs	# of expressed genes	# of tested SNPs
GTEx sun-exposed skin	8872	1336160	26917	11552519
GTEx Not sun-exposed skin	5664	741588	26010	11552519
TCGA SKCM (CNV-adjusted)	1193	209394	17660	9015025
TCGA SKCM (neutral copy genes only)	400	55500	17660*	9015025
# of eGenes (FDR <0.05): number of genome-wide significant eQTL genes
# of significant SNP-gene pairs: number of genome-wide significant SNP-gene pairs (NOT LD-pruned)
# of expressed genes: number of genes (GeneCODE release 19) expressed above background levels and tested for eQTL (See Method section)
# of tested SNPs: number of genotyped or imputed SNPs passing QC and tested for eQTL (See Method section)
# of pigmentation genes: 379 hand-curated pigmentation genes (searched by OMIM: “pigmentation”, “melanocyte”, “melanosome”, “albinism”, MGI: “pigmentation”, “melanocyte”, “melanosome”, GO: “pigmentation”, “pigment”, “melanocyte”, or literature search; Supplemental Table 5)
*16783 of 17660 genes were of neutral copy and included in the analysis

## Sheet: T-S3
Supplemental Table S3. Summary of eGenes and significant SNPs from melanocytes and 44 GTEx tissue types.
Tissue	Sample size	# of eGenes	# of significant SNP-gene pairs
Thyroid	278	10610	1592982
Nerve - Tibial	256	10489	1491673
Testis	157	9435	1148143
Cells - Transformed fibroblasts	272	9413	1315975
Skin - Sun Exposed (Lower leg)	302	9069	1336160
Adipose - Subcutaneous	298	9026	1311216
Artery - Tibial	285	8535	1245107
Esophagus - Mucosa	241	7784	1118435
Lung	278	7774	1095502
Muscle - Skeletal	361	7508	1124399
Whole Blood	338	7332	1060536
Esophagus - Muscularis	218	7322	1019564
Artery - Aorta	197	6599	878091
Skin - Not Sun Exposed (Suprapubic)	196	5793	741587
Skin melanocytes (current study)	106	4997	597335
Colon - Transverse	169	4853	592500
Heart - Left Ventricle	190	4814	620472
Adipose - Visceral (Omentum)	185	4667	593623
Pancreas	149	4568	526676
Brain - Cerebellum	103	4528	536129
Breast - Mammary Tissue	183	4411	590547
Heart - Atrial Appendage	159	4203	519403
Stomach	170	3818	467074
Adrenal Gland	126	3529	405728
Brain - Cerebellar Hemisphere	89	3403	384237
Cells - EBV-transformed lymphocytes	114	3116	369167
Colon - Sigmoid	124	3066	378071
Esophagus - Gastroesophageal Junction	127	2978	379880
Spleen	89	2881	294725
Brain - Cortex	96	2768	303393
Brain - Caudate (basal ganglia)	100	2612	290996
Artery - Coronary	118	2511	299201
Pituitary	87	2260	269321
Brain - Nucleus accumbens (basal ganglia)	93	2202	251700
Brain - Frontal Cortex (BA9)	92	2152	252630
Brain - Putamen (basal ganglia)	82	1653	188235
Liver	97	1644	189024
Ovary	85	1615	185414
Prostate	87	1500	182260
Small Intestine - Terminal Ileum	77	1415	151464
Brain - Anterior cingulate cortex (BA24)	72	1289	154580
Brain - Hypothalamus	81	1253	154288
Brain - Hippocampus	81	1164	148173
Uterus	70	941	112949
Vagina	79	859	122055
Sample size: number of samples included in eQTL analyses. 44 GTEx tissue types with >=70 samples were listed for comparison with our melanocyte dataset.
# of eGene: number of genome-wide significant eQTL genes
# of significant SNP-gene pairs: number of genome-wide significant SNP-gene pairs (NOT LD-pruned)

## Sheet: T-S4
Supplemental Table S4. Melanocyte eGenes GO term enrichment
GO term (biological process)	P-value	Matches
single-organism metabolic process [GO:0044710]	2e-05	1152
mitochondrial translation [GO:0032543]	0.0011	48
single-organism biosynthetic process [GO:0044711]	0.0022	412
organelle organization [GO:0006996]	0.013	815
oxoacid metabolic process [GO:0043436]	0.014	269
organonitrogen compound metabolic process [GO:1901564]	0.018	519
organic acid metabolic process [GO:0006082]	0.019	272
cofactor biosynthetic process [GO:0051188]	0.028	60
GO term (molecular function)	P-value	Matches
catalytic activity [GO:0003824]	5.2e-08	1232
ion binding [GO:0043167]	0.0024	1310
binding [GO:0005488]	0.024	2840
anion binding [GO:0043168]	0.045	599
Pathways	P-value	Matches
Lysosome	0.00061	48
Metabolic pathways	0.0013	287
Mitochondrial translation	0.011	36
Mitochondrial translation elongation	0.039	33
Mitochondrial translation termination	0.039	33
n=4193 genes, P<0.05 (HumanMine v3.0, 2016 July)
Matches: the number of times a given GO term or a pathway term appears for 4193 melanocyte eGenes (eGenes that have matching gene names in HUGO Gene Nomenclature Committee at the time of search)
P-value: the probability that result occurs by chance calculated using the Hypergeometric distribution considering the size of each GO term group and corrected for multiple tests using Holm-Bonferroni method

## Sheet: T-S5
Supplemental Table S5. Pigmentation-related eGenes from melanocytes and other relevant eQTL datasets
	Melanocyte	Skin_Sun_Exposed	Skin_Not_Sun_Exposed	TCGA SKCM (CNV-adjusted)	Union
Sample size	106	302	196	443
# of eGenes (FDR<0.05)	4997	8872	5664	1193	12136
# of eGenes (GO "melanin")	11	4	3	1	14
% of total eGenes	0.220132	0.0450857	0.0529661	0.0838223	0.115359
% of gene group (n=24)	45.8333	16.6667	12.5	4.16667	58.3333
# of eGenes (GO "pigment")	56	86	44	12	120
% of total eGenes	1.12067	0.969342	0.776836	1.00587	0.988794
% of gene group (n=245)	22.8571	35.102	17.9592	4.89796	48.9796
# of eGenes (Pigmentation genes)	75	104	60	11	150
% of total eGenes	1.5009	1.17223	1.05932	0.922045	1.23599
% of gene group (n=379)	19.7889	27.4406	15.8311	2.90237	39.5778
GO “melanin”: 24 genes searched by GO term “melanin” in human.
GO “pigment”: 245 genes searched by GO term “pigment” in human (http://amigo.geneontology.org; May 2017).
Pigmentation genes: 379 hand-curated pigmentation genes (searched by OMIM: “pigmentation”, “melanocyte”, “melanosome”, “albinism”, MGI: “pigmentation”, “melanocyte”, “melanosome”, GO: “pigmentation”, “pigment”, “melanocyte”, or literature search).
See Supplemental Table 5 for the full list of the genes.

## Sheet: T-S6
Supplemental Table S6. List of pimentation-related melanocyte eGenes
GO term "melanin"	Melanocyte eGene q-value	GO term "pigment"	Melanocyte eGene q-value	379 curated pigmentation genes	Melanocyte eGene q-value
ASIP		ABCA4		ABCB6
BCL2	0.00642812	ADA		ACD
CDH3		ADAMTS20		ACPP
CITED1		ADAMTS9		ACVR2A	0.0318122
CTNS	3.79853e-06	AHCY		ADAM17	7.37193e-05
DCT	7.49484e-05	ALAD	0.0192163	ADAMTS20
DDT		ALAS1		ADAR
MC1R	0.00376811	ALAS2		AEBP2
MCHR1	0.000145046	AMBP		AFG3L2
MCHR2		ANKRD27		ALDH2
MYO5A	0.044259	ANXA11		ALX3
OCA2	1.08886e-16	ANXA2		ANKRD27
PMCH		ANXA2P2		ANXA2
PMCHL1		ANXA6		AP1S1	9.26926e-14
PMCHL2		AP1G1		AP3B1	0.00362536
PMEL		AP1M1	0.0183063	AP3D1
RAPGEF2		AP3B1	0.00362536	APC	0.0320132
SLC24A5		AP3D1		APOE	0.000236433
SLC45A2	0.00077481	APRT	0.000672691	ARCN1
TRPC1	2.13624e-06	ARCN1		ASCL1
TYR	0.00581785	ARL6		ASIP
TYRP1		ASIP		ATE1
WNT5A	0.00660754	ATP1A1		ATG7	0.000837069
ZEB2		ATP1B3		ATOX1
		ATP6AP2		ATP1A1
		ATP6V0A1		ATP6AP2
		ATP6V1B2		ATP6V0A1
		ATP6V1G2		ATP6V1B2
		ATP7A		ATP7A
		ATPIF1		ATP7B	2.96185e-08
		ATRN		ATR
		BAX		ATRN
		BBS2	5.34576e-10	BACE2	0.0409202
		BBS4		BARX2
		BBS5		BCL2	0.00642812
		BBS7		BCL2L11
		BCL2	0.00642812	BLOC1S1
		BCL2L11		BLOC1S2
		BDH2		BLOC1S3
		BLOC1S1		BLOC1S4
		BLOC1S2		BLOC1S5
		BLOC1S3		BLOC1S6
		BLOC1S4		BMPR2
		BLOC1S5		BNC2
		BLOC1S5-TXNDC5		BRAF
		BLOC1S6		BRCA1
		BLVRA	0.00146948	BTD	7.94948e-05
		BLVRB		C10ORF11
		BSG		C3orf38
		C10orf11	3.9419e-11	CASR
		C12orf10		CBL	0.0206741
		CALU		CCDC28B
		CANX		CDC42
		CAPG	4.49865e-05	CDK4
		CCT4		CDK7	0.00135844
		CD63		CDKN2A
		CDH3		CDX1
		CITED1		CIB2	1.94945e-06
		CLTC		CIDEA	5.3449e-06
		CNP		CISD2	1.25767e-10
		COX10	0.0247113	CLCN7	0.00832153
		COX15		CLTC
		CPOX		COL17A1
		CTNS	3.79853e-06	COL1A1
		CTSB	0.000156818	CORIN
		CTSD		CTC1
		DCT	7.49484e-05	CTNNB1
		DCTN1		CTNND1	0.0385886
		DCTN2		CTNS	3.79853e-06
		DDT		CTSV
		DNAJC5		CUX1	0.000230006
		DRD2		CYP19A1
		DTNBP1	0.00126238	DCT	7.49484e-05
		EDA		DCTN1
		EDAR		DDB2
		EDN3		DIAPH1
		EDNRB	0.0129308	DMXL2	0.0195677
		EN1		DOCK7
		ERP29		DPH6
		FAP		DRD2
		FASN		DSG4
		FECH	0.0109204	DST
		FIG4		DTNBP1	0.00126238
		FLOT1		EBP
		FXN		ECE1
		GANAB		EDA
		GART		EDAR
		GCHFR		EDARADD
		GGH	0.000949982	EDN1
		GLI3		EDN3
		GMPS		EDNRB	0.0129308
		GNA11		EED	0.0328738
		GNA13		EGFR
		GNAQ		EIF3C
		GPNMB	0.00349318	ELOVL3
		GPR143		EN1
		HMBS	2.15472e-11	ENDOG	0.00653238
		HMOX1		EPG5
		HMOX2	9.97102e-08	ERBB3
		HPRT1		ERCC2
		HPS1	0.00332794	ERCC3	0.00550336
		HPS3		ERCC5
		HPS4	0.00019971	ERCC6	0.00730986
		HPS5		ERP44
		HPS6		ETS1
		HPX		FBXO11
		HSP90AA1		FGFR2	0.00639076
		HSP90AB1		FIG4
		HSP90B1		FLG	4.21434e-09
		HSPA5		FOXD3
		HSPA8		FOXN1
		IBA57		FREM2
		IHH		FSCN1	1.25399e-05
		ITGB1	0.0123431	FZD1
		ITGB3	9.78668e-09	FZD4
		KIF13A		FZD7
		KIT		GART
		KITLG		GAS7
		KRT76		GATA3
		LAMP1		GC
		LEF1		GCHFR
		LYST	0.0144133	GGT1	2.29187e-09
		MC1R	0.00376811	GJB2
		MED1		GLI3
		MEF2C		GNA11
		MITF		GNAI3
		MKKS		GNAQ
		MLANA		GNAS
		MMP14		GPC3
		MREG		GPER1	0.00499042
		MTHFD1		GPNMB	0.00349318
		MTHFD1L		GPR143
		MYH11	0.000117564	GPR161
		MYO5A	0.044259	GPR89A
		MYO7A	0.0374203	GTF2IRD1
		MYRIP		H2AFY
		MYSM1	0.0381306	H2AFY2
		NAP1L1		HDAC1
		NCSTN		HDAC2
		NF1		HELLS
		NFE2L1		HES1
		OCA2	1.08886e-16	HMOX1
		P4HB		HPS1	0.00332794
		PAICS		HPS3
		PAX2		HPS4	0.00019971
		PDCD6IP		HPS5
		PDIA3		HPS6
		PDIA4		HRAS
		PDIA6		HSP90AA1
		PMEL		HSP90AB1
		POMC		HSP90B1
		PPARGC1A		HSPA8
		PPAT		HTR2C
		PPIB		IFNG
		PPOX		IKBKG
		PRDX1		IL17a
		PRPS1		IL6
		RAB11A		ILK	0.0036889
		RAB11B		IRF4	1.95808e-10
		RAB17	0.00139149	IRS2
		RAB1A		ITGB1	0.0123431
		RAB27A		KIF13A
		RAB27B		KIT
		RAB29		KITLG
		RAB2A	0.00256449	KNTC1
		RAB32		KRAS	0.000219031
		RAB35		KRT1
		RAB38	2.1851e-06	KRT17
		RAB5A	1.2406e-08	KRT2
		RAB5B		KRT27
		RAB5C		KRT4
		RAB7A	0.0458162	KRT5
		RAB9A		KRT75
		RAC1	0.0225917	KRT76
		RACK1		KRT9
		RAN		L1CAM
		RAPGEF2		LASP1
		RARB	0.00376811	LEF1
		RARG		LIPH
		RP1		LMNA
		RP1L1		LMX1A
		RP9	0.000255219	LVRN
		RPGR		LYST	0.0144133
		RPGRIP1		MAGOH
		RPN1	0.00386257	MAP1LC3A	0.00803833
		RRH		MBTPS1
		SDCBP	0.00115083	MC1R	0.00376811
		SEC22B	0.000255898	MC2R
		SERPINF1		MCHR2
		SGSM2		MCM2
		SHMT1		MCOLN3	7.43954e-07
		SHROOM2		MDM2
		SHROOM3		MDM4	0.0118713
		SLC11A2		MEF2C
		SLC1A4		MEMO1	0.00332708
		SLC1A5		MGRN1
		SLC24A5		MITF
		SLC25A38	0.0383259	MKLN1
		SLC25A39		MLANA
		SLC2A1		MLPH
		SLC3A2		MMP14
		SLC45A2	0.00077481	MPZL3
		SNAI2		MREG
		SNAPIN		MYC
		SND1		MYH8
		SOX10		MYO10
		SPARC		MYO5A	0.044259
		SPNS2		MYO6
		STOM	0.00858406	MYRIP
		STX3		MYSM1	0.0381306
		SYNGR1	0.0069889	NF1
		SYPL1		NFIB
		SYTL1		NOTCH1
		SYTL2		NOTCH2	0.000222876
		SZT2		NPB
		TBC1D32		NPW
		TFRC	0.00639374	NR0B1
		TH		NR4A3
		TMED10		NRAS
		TMEM14C	0.000747568	NSDHL
		TMEM33		NTRK1
		TPP1		OAT
		TRAPPC6A		OCA2	1.08886e-16
		TRPC1	2.13624e-06	OPHN1
		TRPV2		OPRM1
		TSPO	0.00121537	OSTM1	6.14583e-10
		TYR	0.00581785	OTC
		TYRP1		P4HB
		UGT1A1		PAH
		UGT1A10		PAICS
		UGT1A4		PAQR7
		UGT1A7		PAX3
		UGT1A8		PCBD1
		UGT1A9		PDE11A
		UROD	0.000785075	PDE3B
		UROS	2.96829e-05	PDE8B	1.76305e-05
		USP13		PDIA6
		VANGL1		PEPD
		VPS33A		PFAS	0.00034155
		VPS33B	1.65379e-06	PIAS3
		WNT5A	0.00660754	PICALM	0.000340392
		YWHAB	0.000160377	PLXNB2
		YWHAE		PMEL
		YWHAZ		POLA1
		ZEB2		POLG
				POLH
				POLR1A	4.07339e-08
				POMC
				POU1F1
				PPARGC1A
				PPARGC1B
				PRKACA
				PRKAR1A
				PRKCZ
				PRKDC
				PTCH1
				PTEN
				PTPN11
				PTPN6
				PTS
				PXDN
				RAB11B
				RAB17	0.00139149
				RAB1A
				RAB27A
				RAB32
				RAB36
				RAB38	2.1851e-06
				RAB7A	0.0458162
				RAB9A
				RABGGTA
				RAC1	0.0225917
				RACK1
				RAD50
				RAPH1
				RB1
				RBPJ
				RECQL4
				REST	0.0215422
				RFWD2
				RLBP1
				RPL24
				RPL27A
				RPL38
				RPS19
				RPS20	0.0300054
				RPS6
				RPS7
				RUVBL2
				RXRA
				SASH1
				SEMA3C	0.00570693
				SEMA4C
				SGSM2
				SIK2
				SLC1A4
				SLC24A4	5.34576e-10
				SLC24A5
				SLC29A3
				SLC30A4
				SLC31A1
				SLC3A2
				SLC45A2	0.00077481
				SLC6A19
				SLC7A11
				SMARCC1
				SNAI2
				SNAPIN
				SOX10
				SOX18
				SOX5
				SOX9	0.032369
				SPAG9
				SRC
				ST3GAL5
				STK11
				STX12
				STX17	0.000152098
				STX3
				SUFU	1.02213e-09
				SUZ12
				SYTL1
				SYTL2
				SZT2
				TAL1
				TBC1D10A
				TBC1D10B
				TBX10
				TBX15
				TBX19
				TBX2
				TDO2
				TERC
				TERF1
				TERF2IP	0.0363838
				TERT
				TFAP2A
				TFRC	0.00639374
				TGFB2
				TH
				TINF2
				TMEM79	0.017776
				TNF
				TP53
				TPCN2
				TRAF4
				TRAF6
				TRAPPC6A
				TRIM24	0.013803
				TRPM1	1.03127e-09
				TRPM7
				TSC1
				TTC7A
				TYR	0.00581785
				TYRP1
				UGT1A1
				UQCRFS1
				USF2
				USP13
				VAC14
				VAMP7
				VANGL1
				VPS33A
				WDR12
				WIF1
				WIPI1	0.0276781
				WNT1
				WNT3A
				WRAP53
				XPA
				YWHAB	0.000160377
				YWHAE
				YWHAZ
				YY1
				ZBTB17
				ZDHHC21
				ZEB1
				ZEB2
				ZIC2

## Sheet: T-S7
Supplemental Table S7. Genome-wide ASE variants
	# of ASE variant (FDR<0.05 or AE>0.15)	Mean |AE|	# of ASE gene (>=1 ASE variant)	# of melanocyte eGene	# of ASE variant in melanocyte eGene	Enrichment P-value	Odds ratio
Single-individual per locus binomial test (all variants in 106 individuals)	163352	0.217	9695	2972	77932	NA	NA
Single-individual per locus binomial test (unique variants in 106 individuals)	48038	0.184	9695	2972	18532	2.34e-73	1.82
# of ASE variant (FDR<0.05 or AE>0.15): number of heterozygous coding variants that show significant allelic difference after binomial test and correction for multiple testing (Benjamini and Hochberg) or allelic epxresion value |0.5- expression proportion of reference allele| is larger than 0.15
Mean |AE|: mean of absolute values of allelic expression |0.5- expression proportion of reference allele| from all the ASE SNPs passing cutoff
# of ASE gene (>=1 ASE variant): number of genes that harbor one or more variants passing cutoff
# of eGene: number of melanocyte eGenes that are ASE genes
Enrichment P-value: Fisher's exact P-value for enrichment of melanocyte eGenes in ASE genes
Odds ratio: Odds ratio for enrichmet of melanocyte eGenes in ASE genes

## Sheet: T-S8
Supplemental Table S8. LD score regression of melanocyte-specific genes for melanoma heritability enrichment
Melanoma heritability partitioning using top 4000 tissue-specific genes
Tissue	Prop. SNPs	Prop. h2	Prop. h2 Std Error	Enrichment	Enrichment Std Error	Enrichment P-value	Enrichment FDR	Tissue category
Minor_Salivary_Gland	0.228321	0.525478	0.0766083	2.30149	0.33553	1.33825e-06	6.8251e-05	Salivary Gland
Melanocytes	0.229707	0.583121	0.0660611	2.53855	0.287589	2.45259e-06	0.00012263	Skin
Skin_Not_Sun_Exposed_Suprapubic	0.221704	0.559066	0.0594166	2.52167	0.267999	3.10697e-06	0.000152241	Skin
Skin_Sun_Exposed_Lower_leg	0.223477	0.576997	0.0590837	2.58191	0.264384	8.62276e-06	0.000413893	Skin
Pancreas	0.218403	0.575728	0.0831546	2.63608	0.38074	9.90356e-06	0.000465467	Pancreas
Small_Intestine_Terminal_Ileum	0.214544	0.627234	0.0838103	2.92358	0.390645	1.34649e-05	0.000619387	Small Intestine
Colon_Transverse	0.221894	0.577964	0.0780411	2.60469	0.351705	1.88296e-05	0.000847331	Colon
Testis	0.224242	0.488875	0.0662973	2.18013	0.295651	2.50654e-05	0.00110288	Testis
Cells_Transformed_fibroblasts	0.253416	0.592243	0.0769654	2.33704	0.303712	4.37085e-05	0.00187947	Skin
Nerve_Tibial	0.25115	0.567969	0.0760278	2.26147	0.302719	9.61327e-05	0.00403757	Nerve
Lung	0.254681	0.552958	0.0711179	2.17118	0.279243	0.000115503	0.00473563	Lung
Spleen	0.198141	0.549599	0.0786133	2.77378	0.396755	0.00012908	0.00516321	Spleen
Esophagus_Mucosa	0.221478	0.533823	0.0803932	2.41027	0.362985	0.000400516	0.0156201	Esophagus
Breast_Mammary_Tissue	0.249855	0.453687	0.0689599	1.8158	0.275999	0.000419644	0.0159465	Breast
Adipose_Subcutaneous	0.265335	0.458813	0.0625537	1.72918	0.235754	0.000530446	0.0196265	Adipose Tissue
Prostate	0.193425	0.490295	0.0731595	2.5348	0.378231	0.000546652	0.0196795	Prostate
Thyroid	0.227092	0.491602	0.0656156	2.16477	0.288938	0.000553028	0.0196795	Thyroid
Uterus	0.2346	0.435262	0.062386	1.85533	0.265925	0.000601998	0.0204679	Uterus
Stomach	0.221676	0.466763	0.0672266	2.10561	0.303266	0.000882473	0.0291216	Stomach
Cells_EBV_transformed_lymphocytes	0.223667	0.448373	0.0658738	2.00465	0.294518	0.00101887	0.032604	Blood
Adipose_Visceral_Omentum	0.259481	0.433916	0.0628805	1.67225	0.242332	0.00172306	0.0534148	Adipose Tissue
Vagina	0.235534	0.454304	0.0645099	1.92883	0.273888	0.0018693	0.0560791	Vagina
Bladder	0.249372	0.465829	0.0677874	1.86801	0.271832	0.0019536	0.0566545	Bladder
Artery_Coronary	0.26649	0.470575	0.0789657	1.76583	0.296318	0.00201853	0.0566545	Blood Vessel
Ovary	0.226564	0.467651	0.0689791	2.0641	0.304458	0.00258136	0.0696966	Ovary
Brain_Substantia_nigra	0.294822	0.525048	0.0592866	1.7809	0.201093	0.00286073	0.0743789	Brain
Muscle_Skeletal	0.235609	0.422783	0.0639101	1.79443	0.271255	0.0028794	0.0743789	Muscle
Esophagus_Gastroesophageal_Junction	0.241635	0.452897	0.0674753	1.8743	0.279244	0.0032076	0.0769824	Esophagus
Colon_Sigmoid	0.243326	0.417101	0.0608257	1.71416	0.249976	0.00327001	0.0769824	Colon
Artery_Tibial	0.27931	0.45637	0.0599223	1.63392	0.214537	0.00333933	0.0769824	Blood Vessel
Whole_Blood	0.200263	0.460462	0.0748558	2.29928	0.373787	0.00336692	0.0769824	Blood
Artery_Aorta	0.265115	0.454954	0.0678668	1.71606	0.25599	0.00400928	0.0801856	Blood Vessel
Brain_Amygdala	0.304009	0.523173	0.0584295	1.72091	0.192196	0.00431099	0.0819089	Brain
Liver	0.215444	0.461075	0.0741332	2.14012	0.344094	0.00468338	0.0843008	Liver
Heart_Left_Ventricle	0.258624	0.44396	0.0678703	1.71662	0.262429	0.00531994	0.0904389	Heart
Pituitary	0.213405	0.426294	0.0669482	1.99758	0.313714	0.00567276	0.0907641	Pituitary
Brain_Cortex	0.298892	0.504937	0.0608188	1.68936	0.203481	0.0091913	0.13787	Brain
Brain_Hippocampus	0.306413	0.500545	0.0573025	1.63357	0.187011	0.00955116	0.13787	Brain
Brain_Frontal_Cortex_BA9	0.3109	0.512121	0.0614129	1.64722	0.197533	0.0117402	0.152623	Brain
Adrenal_Gland	0.223621	0.429196	0.0739934	1.9193	0.330888	0.0124656	0.152623	Adrenal Gland
Kidney_Cortex	0.219917	0.394061	0.0616843	1.79186	0.280489	0.013766	0.152623	Kidney
Brain_Putamen_basal_ganglia	0.298224	0.485233	0.0624709	1.62707	0.209476	0.0186179	0.186179	Brain
Brain_Caudate_basal_ganglia	0.300641	0.476437	0.061837	1.58474	0.205683	0.0225924	0.203332	Brain
Esophagus_Muscularis	0.248934	0.386886	0.0626178	1.55417	0.251543	0.02462	0.203332	Esophagus
Brain_Nucleus_accumbens_basal_ganglia	0.299637	0.4524	0.0548776	1.50983	0.183147	0.0252326	0.203332	Brain
Brain_Anterior_cingulate_cortex_BA24	0.31047	0.490626	0.0623216	1.58027	0.200733	0.0255879	0.203332	Brain
Brain_Spinal_cord_cervical_c_1	0.281162	0.405904	0.0568867	1.44366	0.202327	0.0272364	0.203332	Brain
Heart_Atrial_Appendage	0.270463	0.406711	0.0666513	1.50376	0.246434	0.0321413	0.203332	Heart
Brain_Hypothalamus	0.303779	0.458234	0.0584658	1.50844	0.192461	0.0341861	0.203332	Brain
Brain_Cerebellum	0.254382	0.395481	0.0733259	1.55467	0.288251	0.0683833	0.203332	Brain
Brain_Cerebellar_Hemisphere	0.256934	0.395778	0.0738717	1.54039	0.287512	0.0747025	0.203332	Brain
Melanoma heritability partitioning using top 2000 tissue-specific genes
Tissue	Prop. SNPs	Prop. h2	Prop. h2 Std Error	Enrichment	Enrichment Std Error	Enrichment P-value	Enrichment FDR	Tissue category
Uterus	0.137592	0.32235	0.0549376	2.3428	0.399279	0.000123608	0.00630401	Uterus
Colon_Transverse	0.12699	0.406855	0.0668739	3.20383	0.526606	0.000146727	0.00733636	Colon
Small_Intestine_Terminal_Ileum	0.127937	0.470651	0.085665	3.67879	0.66959	0.000216144	0.0105911	Small Intestine
Spleen	0.114739	0.403068	0.0685569	3.5129	0.597502	0.000316236	0.0151793	Spleen
Esophagus_Mucosa	0.131191	0.360656	0.0624155	2.7491	0.475761	0.000513656	0.0241418	Esophagus
Melanocytes	0.127195	0.329581	0.0588939	2.59114	0.463021	0.00052173	0.0241418	Skin
Cells_EBV_transformed_lymphocytes	0.130502	0.292947	0.0485328	2.24476	0.371892	0.000897076	0.0403684	Blood
Skin_Sun_Exposed_Lower_leg	0.134075	0.325409	0.0464601	2.42707	0.346524	0.00126197	0.0555266	Skin
Thyroid	0.134334	0.359227	0.0629555	2.67413	0.468649	0.00195111	0.0838978	Thyroid
Lung	0.151127	0.345519	0.0566194	2.28628	0.374648	0.00257673	0.108223	Lung
Testis	0.129416	0.296567	0.0539424	2.29159	0.416815	0.00266108	0.109104	Testis
Kidney_Cortex	0.132441	0.290715	0.0498004	2.19505	0.376018	0.00591888	0.236755	Kidney
Pancreas	0.128455	0.319769	0.0683284	2.48935	0.531924	0.0067548	0.263437	Pancreas
Skin_Not_Sun_Exposed_Suprapubic	0.133328	0.267461	0.0525995	2.00604	0.394512	0.0069676	0.264769	Skin
Minor_Salivary_Gland	0.135527	0.266957	0.0563609	1.96977	0.415866	0.00788162	0.29162	Salivary Gland
Nerve_Tibial	0.148266	0.316698	0.0595801	2.13601	0.401845	0.00824228	0.296722	Nerve
Pituitary	0.12366	0.254263	0.0451181	2.05614	0.364855	0.0106581	0.373033	Pituitary
Cells_Transformed_fibroblasts	0.144613	0.275689	0.0551131	1.90639	0.381108	0.0131621	0.44751	Skin
Breast_Mammary_Tissue	0.147007	0.267518	0.0592599	1.81976	0.403108	0.017231	0.566201	Breast
Prostate	0.106672	0.287565	0.0656491	2.69579	0.615429	0.0171576	0.566201	Prostate
Brain_Amygdala	0.186897	0.369773	0.0650799	1.97848	0.348212	0.0267082	0.827955	Brain
Brain_Putamen_basal_ganglia	0.180851	0.349068	0.0597848	1.93014	0.330576	0.0267183	0.827955	Brain
Liver	0.125232	0.240973	0.0502224	1.92422	0.401036	0.0279054	0.827955	Liver
Ovary	0.133628	0.272707	0.057606	2.04079	0.431092	0.0284802	0.827955	Ovary
Stomach	0.130503	0.285921	0.065762	2.19092	0.503913	0.0275501	0.827955	Stomach
Vagina	0.13794	0.280316	0.0600972	2.03216	0.435676	0.0285746	0.827955	Vagina
Brain_Anterior_cingulate_cortex_BA24	0.182345	0.362515	0.0679329	1.98807	0.372551	0.0332076	0.83019	Brain
Esophagus_Gastroesophageal_Junction	0.141255	0.25059	0.0606663	1.77402	0.42948	0.0339297	0.83019	Esophagus
Bladder	0.140298	0.280875	0.062296	2.00198	0.444026	0.0395542	0.909747	Bladder
Whole_Blood	0.114563	0.259602	0.0624219	2.26601	0.544869	0.0408677	0.909747	Blood
Artery_Coronary	0.154987	0.257577	0.0550874	1.66193	0.355433	0.0473645	0.994654	Blood Vessel
Brain_Nucleus_accumbens_basal_ganglia	0.179057	0.321426	0.0609874	1.7951	0.340603	0.0490041	0.994654	Brain
Adipose_Subcutaneous	0.15339	0.233062	0.0499164	1.5194	0.32542	0.0862623	1	Adipose Tissue
Adipose_Visceral_Omentum	0.148475	0.241861	0.0570271	1.62897	0.384085	0.0659126	1	Adipose Tissue
Adrenal_Gland	0.128727	0.217185	0.0485437	1.68717	0.377105	0.0703297	1	Adrenal Gland
Artery_Aorta	0.157929	0.245042	0.0541532	1.5516	0.342896	0.103278	1	Blood Vessel
Artery_Tibial	0.165286	0.213631	0.050673	1.29249	0.306577	0.316229	1	Blood Vessel
Brain_Caudate_basal_ganglia	0.178742	0.318686	0.0630763	1.78294	0.352891	0.0654034	1	Brain
Brain_Cerebellar_Hemisphere	0.164633	0.237276	0.0562716	1.44124	0.3418	0.206832	1	Brain
Brain_Cerebellum	0.160498	0.240885	0.0600597	1.50086	0.374208	0.194258	1	Brain
Brain_Cortex	0.182814	0.334897	0.0667699	1.83191	0.365235	0.0615144	1	Brain
Brain_Frontal_Cortex_BA9	0.189663	0.286966	0.0709198	1.51303	0.373926	0.211046	1	Brain
Brain_Hippocampus	0.184165	0.305101	0.0549181	1.65667	0.2982	0.0651437	1	Brain
Brain_Hypothalamus	0.177965	0.296126	0.0557461	1.66396	0.313242	0.0733222	1	Brain
Brain_Spinal_cord_cervical_c_1	0.172082	0.263852	0.0531122	1.53329	0.308645	0.0825101	1	Brain
Brain_Substantia_nigra	0.181026	0.275064	0.0563371	1.51947	0.311209	0.134976	1	Brain
Colon_Sigmoid	0.145916	0.215954	0.0557107	1.47999	0.3818	0.176216	1	Colon
Esophagus_Muscularis	0.14603	0.23449	0.0587869	1.60577	0.402568	0.0828351	1	Esophagus
Heart_Atrial_Appendage	0.158493	0.198526	0.0506506	1.25259	0.319576	0.415232	1	Heart
Heart_Left_Ventricle	0.153212	0.217127	0.0575958	1.41716	0.375922	0.233779	1	Heart
Muscle_Skeletal	0.137034	0.201582	0.0513384	1.47104	0.37464	0.224644	1	Muscle
Melanoma heritability partitioning using top 1000 tissue-specific genes
Tissue	Prop. SNPs	Prop. h2	Prop. h2 Std Error	Enrichment	Enrichment Std Error	Enrichment P-value	Enrichment FDR	Tissue category
Colon_Transverse	0.0707232	0.293737	0.0519636	4.15334	0.734747	0.000136946	0.00698422	Colon
Small_Intestine_Terminal_Ileum	0.0691543	0.24813	0.0613903	3.58806	0.887729	0.000275599	0.0137799	Small Intestine
Cells_EBV_transformed_lymphocytes	0.0713006	0.189717	0.0454493	2.6608	0.637432	0.00245813	0.120448	Blood
Spleen	0.066019	0.208418	0.0440625	3.15693	0.667421	0.00754705	0.362258	Spleen
Esophagus_Mucosa	0.0728092	0.176083	0.0449049	2.41842	0.616748	0.0079345	0.372922	Esophagus
Melanocytes	0.0672743	0.191701	0.0494887	2.84955	0.735626	0.00800756	0.372922	Skin
Pancreas	0.0697759	0.179707	0.0417143	2.57549	0.597833	0.00807813	0.372922	Pancreas
Minor_Salivary_Gland	0.0783692	0.193968	0.0543302	2.47506	0.69326	0.0101748	0.447693	Salivary Gland
Skin_Not_Sun_Exposed_Suprapubic	0.0740557	0.174182	0.0382422	2.35204	0.516397	0.0115483	0.496576	Skin
Testis	0.0705952	0.194909	0.0450208	2.76093	0.637732	0.0115881	0.496576	Testis
Lung	0.0864728	0.220393	0.0543501	2.5487	0.628522	0.0122818	0.503556	Lung
Prostate	0.0591024	0.148286	0.0336345	2.50897	0.569088	0.0140684	0.562735	Prostate
Uterus	0.07417	0.181022	0.0423994	2.44063	0.571652	0.0151188	0.589634	Uterus
Kidney_Cortex	0.0749747	0.208721	0.046303	2.78389	0.617582	0.0171794	0.652818	Kidney
Pituitary	0.0705151	0.143659	0.0316772	2.03728	0.449225	0.0239423	0.885864	Pituitary
Skin_Sun_Exposed_Lower_leg	0.0738262	0.151723	0.0401543	2.05514	0.543903	0.024984	0.899423	Skin
Thyroid	0.075288	0.197237	0.0491224	2.61976	0.652459	0.031256	1	Thyroid
Nerve_Tibial	0.0845988	0.186028	0.044955	2.19894	0.531391	0.0372827	1	Nerve
Brain_Hypothalamus	0.0998841	0.211663	0.0490959	2.11909	0.491529	0.0526775	1	Brain
Ovary	0.0710483	0.163542	0.0447952	2.30185	0.63049	0.058602	1	Ovary
Stomach	0.0757126	0.150415	0.0479398	1.98666	0.63318	0.0806066	1	Stomach
Vagina	0.0771731	0.160834	0.0452531	2.08407	0.586385	0.0811898	1	Vagina
Brain_Cerebellum	0.0933178	0.184923	0.049185	1.98164	0.52707	0.0827455	1	Brain
Brain_Substantia_nigra	0.102325	0.198091	0.0529647	1.93589	0.517611	0.10237	1	Brain
Adipose_Visceral_Omentum	0.0837377	0.142781	0.0395087	1.7051	0.471815	0.108795	1	Adipose Tissue
Esophagus_Muscularis	0.0824989	0.142306	0.0430772	1.72495	0.522156	0.109538	1	Esophagus
Brain_Caudate_basal_ganglia	0.101486	0.170317	0.0453929	1.67823	0.447281	0.117948	1	Brain
Breast_Mammary_Tissue	0.080068	0.137657	0.0403644	1.71925	0.504127	0.126942	1	Breast
Whole_Blood	0.0644829	0.144669	0.0509122	2.24353	0.789545	0.131629	1	Blood
Brain_Cerebellar_Hemisphere	0.0989641	0.179048	0.0519242	1.80922	0.524676	0.141456	1	Brain
Brain_Cortex	0.101238	0.20789	0.0659966	2.05348	0.651895	0.14828	1	Brain
Adrenal_Gland	0.0719771	0.12393	0.0373355	1.7218	0.518713	0.148726	1	Adrenal Gland
Colon_Sigmoid	0.0848201	0.136218	0.0403566	1.60596	0.475791	0.157673	1	Colon
Brain_Nucleus_accumbens_basal_ganglia	0.0967154	0.170026	0.0544958	1.75801	0.563466	0.184283	1	Brain
Esophagus_Gastroesophageal_Junction	0.0792883	0.118879	0.0343232	1.49932	0.432891	0.200317	1	Esophagus
Artery_Aorta	0.088723	0.13383	0.0415962	1.50841	0.468833	0.275123	1	Blood Vessel
Liver	0.07175	0.10805	0.0332531	1.50593	0.463458	0.275756	1	Liver
Cells_Transformed_fibroblasts	0.0794292	0.118608	0.0387875	1.49325	0.488329	0.278443	1	Skin
Artery_Coronary	0.085662	0.12712	0.0410936	1.48398	0.479718	0.30507	1	Blood Vessel
Adipose_Subcutaneous	0.0860212	0.121496	0.0357317	1.41239	0.415382	0.30554	1	Adipose Tissue
Brain_Hippocampus	0.106185	0.164221	0.0542056	1.54655	0.510481	0.307818	1	Brain
Bladder	0.0738553	0.119913	0.0483649	1.62362	0.654861	0.324854	1	Bladder
Brain_Spinal_cord_cervical_c_1	0.0984694	0.138397	0.0428926	1.40548	0.435593	0.334985	1	Brain
Brain_Amygdala	0.104854	0.152699	0.0530775	1.45629	0.506201	0.383161	1	Brain
Artery_Tibial	0.0913252	0.117646	0.0395317	1.28821	0.432867	0.496536	1	Blood Vessel
Muscle_Skeletal	0.0763144	0.100414	0.0364203	1.3158	0.47724	0.510498	1	Muscle
Brain_Putamen_basal_ganglia	0.0997734	0.126517	0.0426989	1.26805	0.427959	0.521892	1	Brain
Brain_Frontal_Cortex_BA9	0.102358	0.141195	0.0628699	1.37942	0.614214	0.536981	1	Brain
Heart_Atrial_Appendage	0.0874743	0.108934	0.0373811	1.24533	0.427338	0.553059	1	Heart
Brain_Anterior_cingulate_cortex_BA24	0.0992455	0.12777	0.0570754	1.28742	0.575093	0.602208	1	Brain
Heart_Left_Ventricle	0.0855201	0.10054	0.0371266	1.17563	0.434127	0.676337	1	Heart
Tissue enrichment FDR adjusted P-values less than 0.05 are highlighted by red
Prop.SNPs: Proportion of SNPs annotated by tissue specific gene set for each tissue
Prop. H2: Propotion of melanoma heritability calculated based on the SNPs annotated by tissue specific gene for each tissue
Prop. h2 Std Error: Stardard error of calculated partitioned melanoma hertability
Enrichment: Calculated by (Prop. heritability) / (Prop. SNPs).
Enrichment Std Error: Stardard error of melanoma hertability enrichment
Enrichment P-value: P-value of melanoma hertability enrichment
Enrichment FDR: FDR adjusted Enrichment P-value

## Sheet: T-S9
Supplemental Table S9. List of genome-wide significant melanocyte trans-eQTL
SNP	cis-eQTL gene	cis-eQTL gene ID	cis-eQTL P-value	trans-eQTL gene	trans-eQTL gene ID	location	beta	t-stat	p-value	Type	bp distance from the SNP	description
5:149826526	RPS14	ENSG00000164587.7	7.27073e-23	RP4-765C7.2	ENSG00000213058.3	1:178380751-178381107	1.22906	23.2841	6.78233e-39	Inter-chromosomal
11:18424223				LDHAP4	ENSG00000214110.3	9:14921335-14922332	-1.16697	-23.1348	1.09386e-38	Inter-chromosomal		lactate dehydrogenase A pseudogene 4 [Source:HGNC Symbol;Acc:6539]
5:149821472	RPS14	ENSG00000164587.7	1.53967e-22	RP11-343H5.4	ENSG00000224114.1	1:206869182-206869614	1.22831	19.5536	2.11614e-33	Inter-chromosomal
5:149826526	RPS14	ENSG00000164587.7	7.27073e-23	CTB-118N6.1	ENSG00000239528.1	5:115898258-115898626	1.23295	18.1914	3.18506e-31	Intra-chromosomal	33928268
11:125439492				EI24P2	ENSG00000236257.1	1:158423988-158425063	1.27402	17.1775	1.5413e-29	Inter-chromosomal		etoposide induced 2.4 pseudogene 2 [Source:HGNC Symbol;Acc:44587]
1:33088441				ZBTB8OSP2	ENSG00000172799.5	2:232298634-232299137	1.7312	16.6873	1.05345e-28	Inter-chromosomal		zinc finger and BTB domain containing 8 opposite strand pseudogene 2 [Source:HGNC Symbol;Acc:30326]
17:80583230				CTD-2095E4.1	ENSG00000265574.1	17:30438581-30439609	1.24917	12.5525	3.84036e-21	Intra-chromosomal	50144649
17:7221707				RP11-255J3.2	ENSG00000236496.2	9:2875442-2876427	-0.835352	-8.91589	7.30078e-14	Inter-chromosomal
6:396321	IRF4	ENSG00000137265.10	7.90354e-16	TMEM140	ENSG00000146859.6	7:134832824-134850967	-0.90973	-8.75767	1.53285e-13	Inter-chromosomal		transmembrane protein 140 [Source:HGNC Symbol;Acc:21870]
6:396321	IRF4	ENSG00000137265.10	7.90354e-16	MIR3681HG	ENSG00000224184.1	2:11988748-12718474	-1.23073	-8.66491	2.36738e-13	Inter-chromosomal
6:396321	IRF4	ENSG00000137265.10	7.90354e-16	PLA1A	ENSG00000144837.4	3:119316689-119348658	-1.05452	-8.38744	8.67625e-13	Inter-chromosomal		phospholipase A1 member A [Source:HGNC Symbol;Acc:17661]
6:396321	IRF4	ENSG00000137265.10	7.90354e-16	NEO1	ENSG00000067141.12	15:73344051-73597547	-1.05417	-8.26509	1.53691e-12	Inter-chromosomal		neogenin 1 [Source:HGNC Symbol;Acc:7754]
6:44215784	SLC35B2	ENSG00000157593.12	3.90568e-10	HSP90AB2P	ENSG00000205940.7	4:13335038-13340281	-0.923739	-8.00108	5.26381e-12	Inter-chromosomal		heat shock protein 90kDa alpha (cytosolic), class B member 2, pseudogene [Source:HGNC Symbol;Acc:32537]
7:106615506				ATN1	ENSG00000111676.10	12:7033626-7051484	-0.334725	-7.86382	9.96544e-12	Inter-chromosomal		atrophin 1 [Source:HGNC Symbol;Acc:3033]
5:165641297				SMARCD2	ENSG00000108604.11	17:61909444-61920425	1.32448	7.71297	2.00622e-11	Inter-chromosomal		SWI/SNF related, matrix associated, actin dependent regulator of chromatin, subfamily d, member 2 [Source:HGNC Symbol;Acc:11107]
SNP: trans-eQTL SNP
Cis-eQTL P-value: cis-eQTL P-value for the index SNP. NS: not significant. Only the smallest P-value is presented if there are multiple associations.
Cis-eQTL gene: significant cis-eQTL gene for the index SNP. Only the gene showing the smallest P-value is presented if there are multiple associations.
Location: genomic location of the trans-eQTL gene (chromosome:start-end)
Beta/t-stat/p-value: values for trans-eQTL
Distance from the SNP: genomic distance of the trans-eQTL gene from the index SNP in case of the intra-chromosomal association
Genes of mappability < 0.8 or overlapping low complexity regions were excluded from the analysis

## Sheet: T-S10
Supplemental Table S10. Assessnent of IRF4 mediation of trans-eQTL genes
A. Regression of residuals against rs12203592 after accounting for IRF4 levels
Gene	SNP	Beta	Standard Error	P - value
MIR3681HG	rs12203592	-0.251526	0.0987167	0.0122975
NEO1	rs12203592	-0.209689	0.0871451	0.0178839
PLA1A	rs12203592	-0.283388	0.0917341	0.00257421
TMEM140	rs12203592	-0.168214	0.0704985	0.0188382
For each trans-gene, residual was first calculated by the linear resgression model: (trans-gene expression ~ IRF4 expression + 3 genotype PCs + 15 PEER factors), then assocaition between the residual and rs12203592 genotype was performed by the linear regression model: (residual ~ rs12203592)
B. Regression of gene expression against rs12203592
Gene	SNP	Beta	Standard Error	P - value
MIR3681HG	rs12203592	-1.23073	0.142036	2.36738e-13
NEO1	rs12203592	-1.05417	0.127545	1.53691e-12
PLA1A	rs12203592	-1.05452	0.125726	8.67625e-13
TMEM140	rs12203592	-0.90973	0.103878	1.53285e-13
For each trans-gene, the assocaition between the trans-gene expression and rs12203592 genotype was performed by the linear regression model: (trans-gene expression ~ rs12203592 + 3 genotype PCs + 15 PEER factors)
C. Regression of gene expression against rs12203592 with IRF4 levels as a covariate
Gene	SNP	Beta	Standard Error	P - value
MIR3681HG	rs12203592	-1.20147	0.208631	1.3168e-07
NEO1	rs12203592	-1.00163	0.187223	7.32465e-07
PLA1A	rs12203592	-1.35367	0.179269	4.49388e-11
TMEM140	rs12203592	-0.803514	0.151795	9.24538e-07
For each trans-gene, the assocaition between the trans-gene expression and rs12203592 genotype with IRF4 expression level as a covariate was performed by the linear regression model: (trans-gene expression ~ rs12203592 + IRF4 expression+ 3 genotype PCs + 15 PEER factors)

[truncated: 10 more sheets: T-S11, T-S12, T-S13, T-S14, T-S15, T-S16, T-S17, T-S18, T-S19, T-S20]
